# Supplementary material
Source: PubMed Central journal article supplement (PMC8449802)
Supplement: NIHMS1706798-supplement-1.pdf [file NIHMS1706798-supplement-1.pdf]

## Supplementary Materials

### **Metformin improves cognitive functions and reduces neuroinflammation after traumatic brain injury**

Victoria L. DiBona\*, Mihir K. Shah, Kayla J. Krause, Wenxin Zhu, Mikayla Voglewede, Dana M. Smith, David P. Crockett, and Huaye Zhang

Department of Neuroscience and Cell Biology, Robert Wood Johnson Medical School, Rutgers, The State University of New Jersey, Piscataway, NJ, USA

\*Correspondence addressed to:

Victoria DiBona  
Department of Neuroscience and Cell Biology  
Rutgers Robert Wood Johnson Medical School  
675 Hoes Lane W.  
Research Towers 3rd Floor  
Piscataway, NJ 08854  
Email: [dibonavl@rutgers.edu](mailto:dibonavl@rutgers.edu)

## Supplementary Figure Legends

**Supplemental Figure 1. Overall Experimental Design.** Timeline of surgery, treatments and behavioral testing.

**Supplemental Figure 2. Memory retained in both vehicle and metformin treated injured animals.** Following six days of Morris Water Maze training, adult CD-1 mice were tested using a probe trial on day 7. The platform was removed from the target quadrant. Animals were placed in the center of the pool and allowed to swim for 60 seconds. The amount of time spent and number of crossings into the target quadrant and overall swim speed were measured. Data represent the mean  $\pm$ SEM. A 2-way ANOVA was performed. N (animals = Vehicle: Naive=8, Sham=12, TBI=10; Metformin: Naive=10, Sham=12, TBI=11).

**Supplemental Figure 3. Animals show no deficiencies in motor function following CCI-TBI.** Adult CD-1 mice were subjected to the pole test at 1, 4 and 7 days post-surgery to examine motor skills and coordination. No significant changes in latency to reach the floor were observed, suggesting that the mice have no deficiency in motor function skills following a CCI-TBI. Data represents the mean  $\pm$  SEM. A 2-way ANOVA was performed. N (animals = Vehicle: Naive=2, Sham=3, TBI=3; Metformin: Naive=2, Sham=3, TBI=5).

**Supplemental Figure 4. Nesting behavior as a measure for stress.** Adult CD-1 mice had their home cage nests ranked each morning, prior to all other testing, starting 1-day post surgery to assess for stress, anxiety, and other emotional disturbances. Nests were ranked on a scale from 1 to 5, with a score of 1 representing no nest and a score of 5 representing a full nest. Old nestlets were removed and new nestlets replaced each morning after scoring.

**Supplemental Figure 5. No significant change in tissue disruption following Controlled Cortical Impact (CCI) injury between vehicle or metformin treatments. Light microscope images were acquired from brain sections at the center of the impact and the percent area of cortical disruption was quantified using ImageJ. No significant difference in % area was found between vehicle or metformin treated CCI-TBI mice. Data represent the percent average  $\pm$  SEM. N= vehicle:15; metformin:17.**

**Supplemental Figure 6. Microglia response following treatment with metformin post-surgery.** Naïve, sham-operated control or CCI-TBI mice were treated with either vehicle or metformin beginning at 1-hour post-surgery and daily thereafter. At 7 days post-injury, mice were sacrificed, their brains sectioned and immunostained for microglia marker Iba1 (red) and nuclear marker DAPI (cyan). Confocal images were acquired of the ipsi-lateral cortex for all mouse tissue at 20x. Scale bar = 30 $\mu$ m.

## Supplementary Figure Legends

[Supplemental Figure 7. 3D renderings of microglia following treatment with metformin. 3D renderings of individual microglia were created using Neurolucida software. Shown are representative reconstructions of microglia from naïve, sham-operated control or CCI-TBI mice following treatment with either vehicle or metformin.](#)

**Supplemental Figure 8. No significant change in microglia density following metformin treatment.** Confocal images were acquired of the ipsi-lateral cortex of CCI-TBI, sham-operated and naïve control mouse tissue and total microglia density manually quantified using ImageJ. No significant difference in microglia density was found between vehicle or metformin treated Naïve, sham-operated control or CCI-TBI mice.

Data represent the mean  $\pm$  SEM. A 2-way ANOVA was performed. N (animals/images) = Vehicle: Naive=8/30, Sham=11/33, TBI=10/31; Metformin: Naive=10/27, Sham=12/36, TBI=10/35.

Supplemental Figure 1

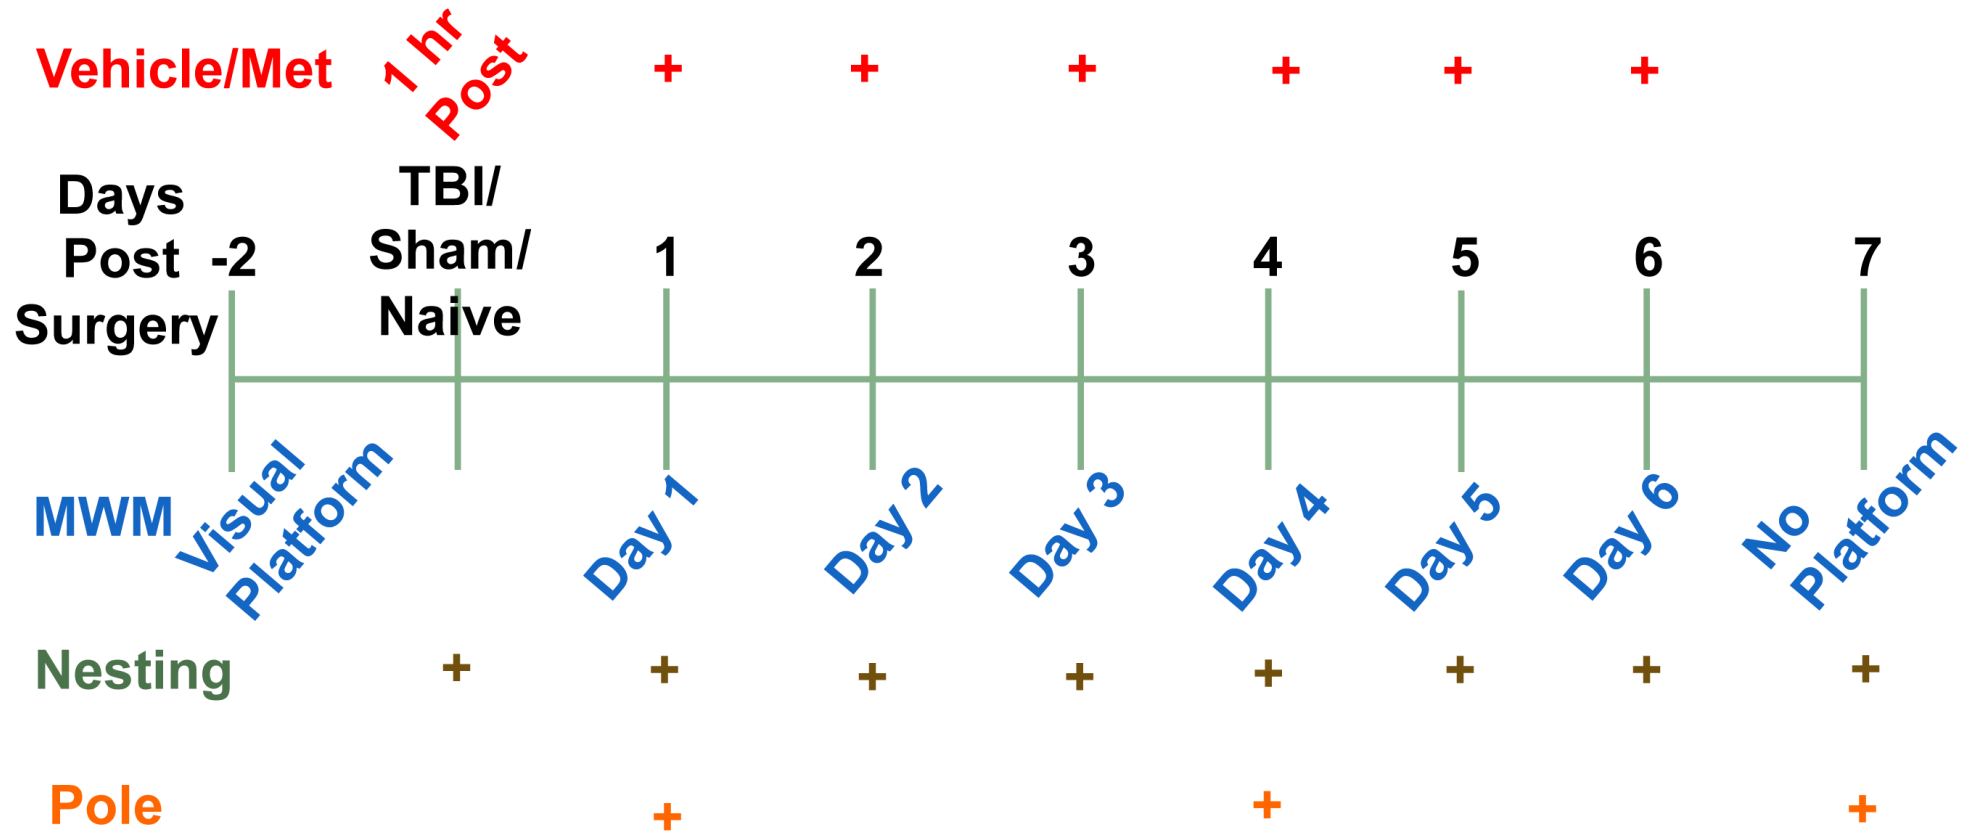

**Supplemental Figure 2 Morris Water Maze - 7 day hidden probe trial - Average time spent in target quadrant**

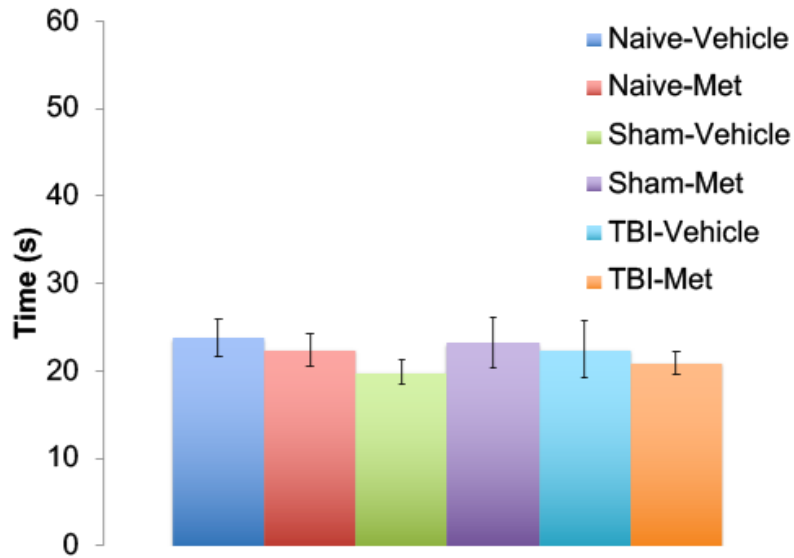

**Morris Water Maze - 7 day hidden probe trial - Average # of crossings into target quadrant**

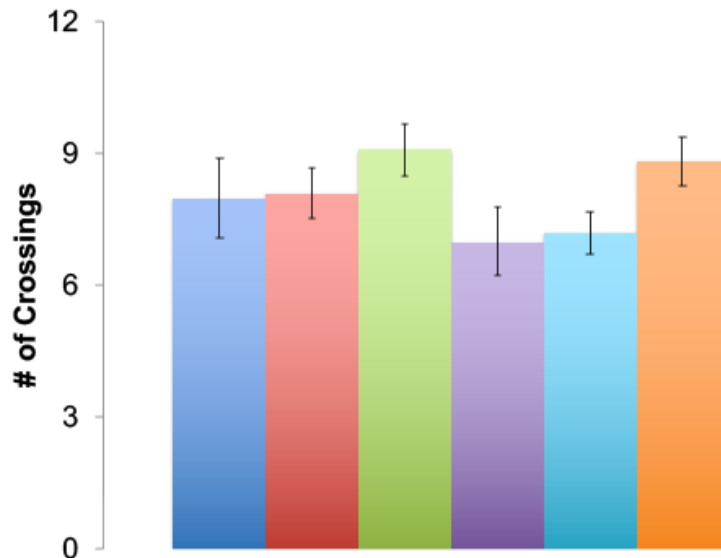

**Morris Water Maze - 7 day hidden probe trial - Mean swim speed of overall trial**

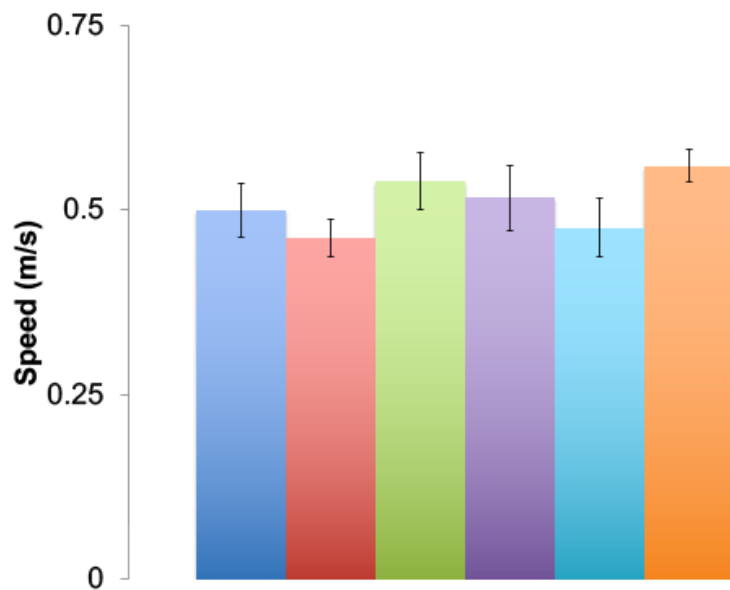

Supplemental Figure 3

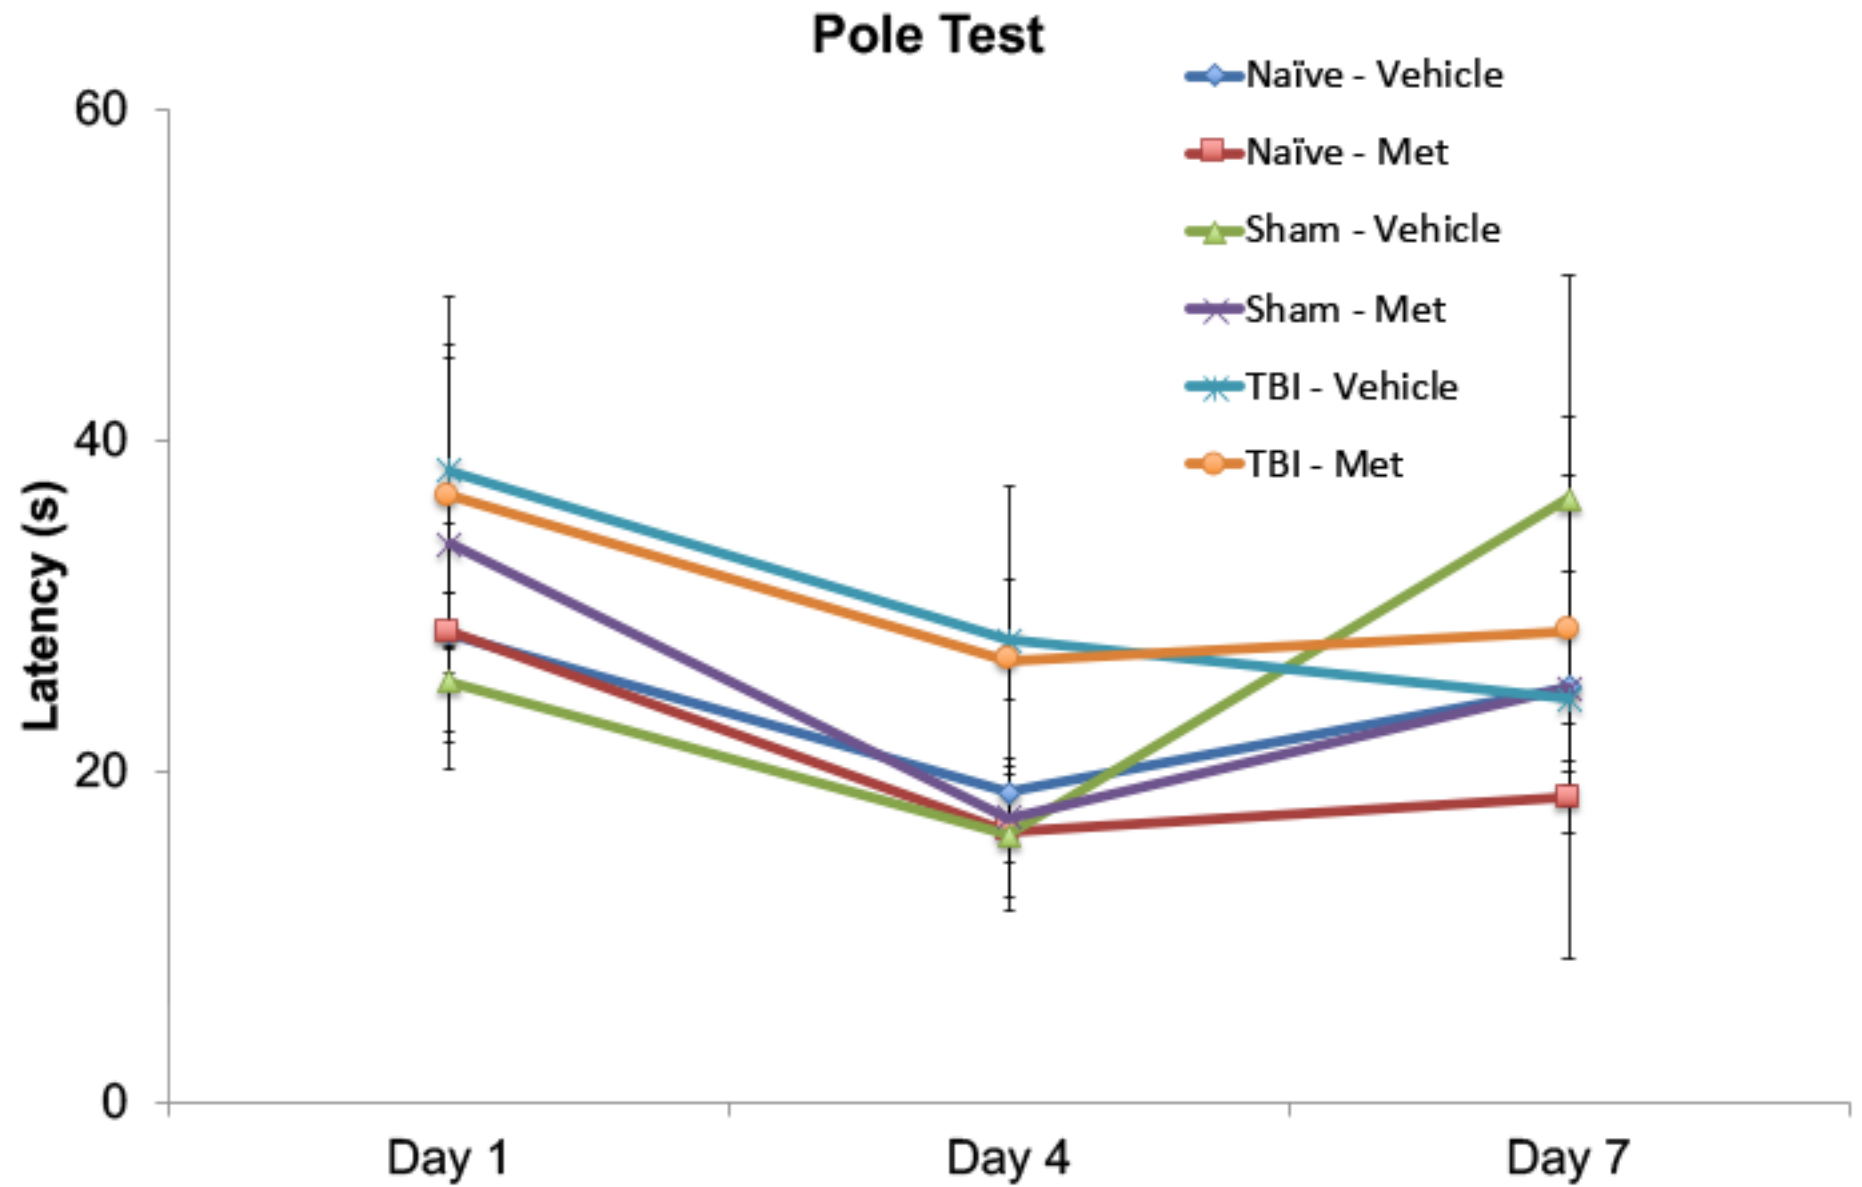

Supplemental Figure 4

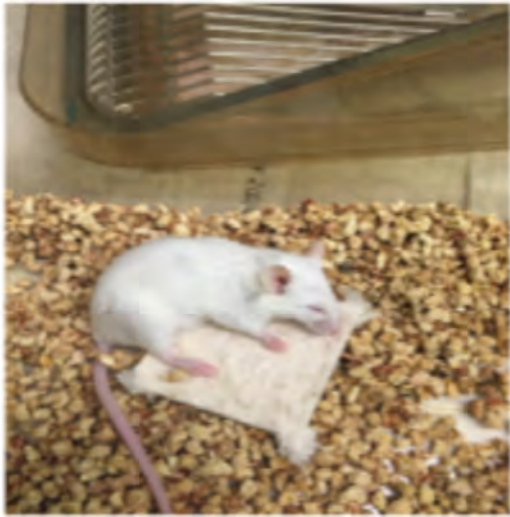

**Score=1**

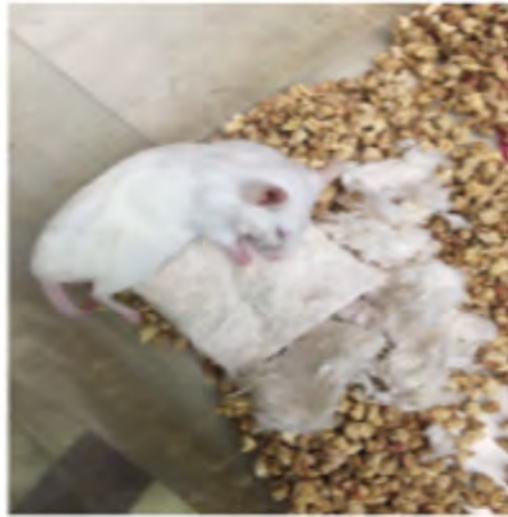

**Score=2**

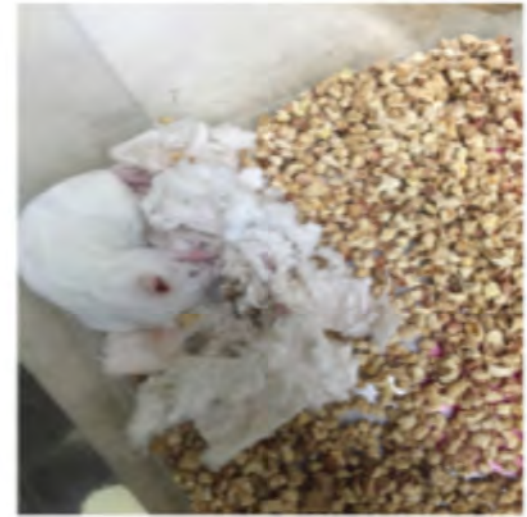

**Score=3**

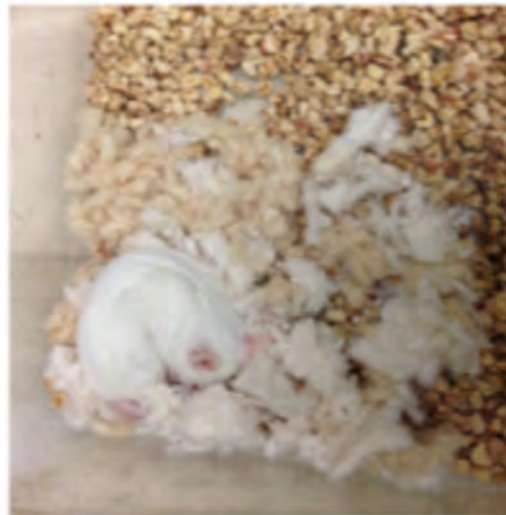

**Score=4**

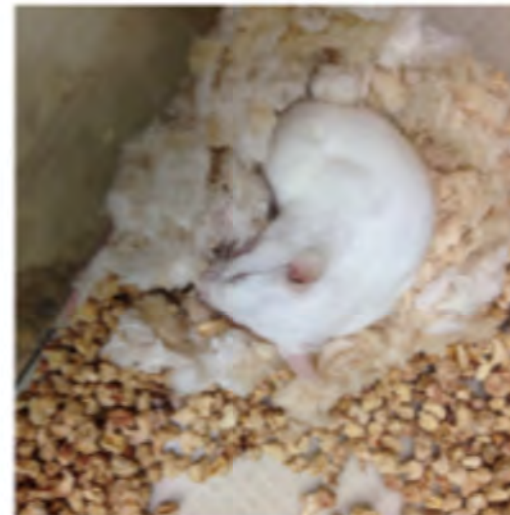

**Score=5**

# Average Cortical Tissue Disruption

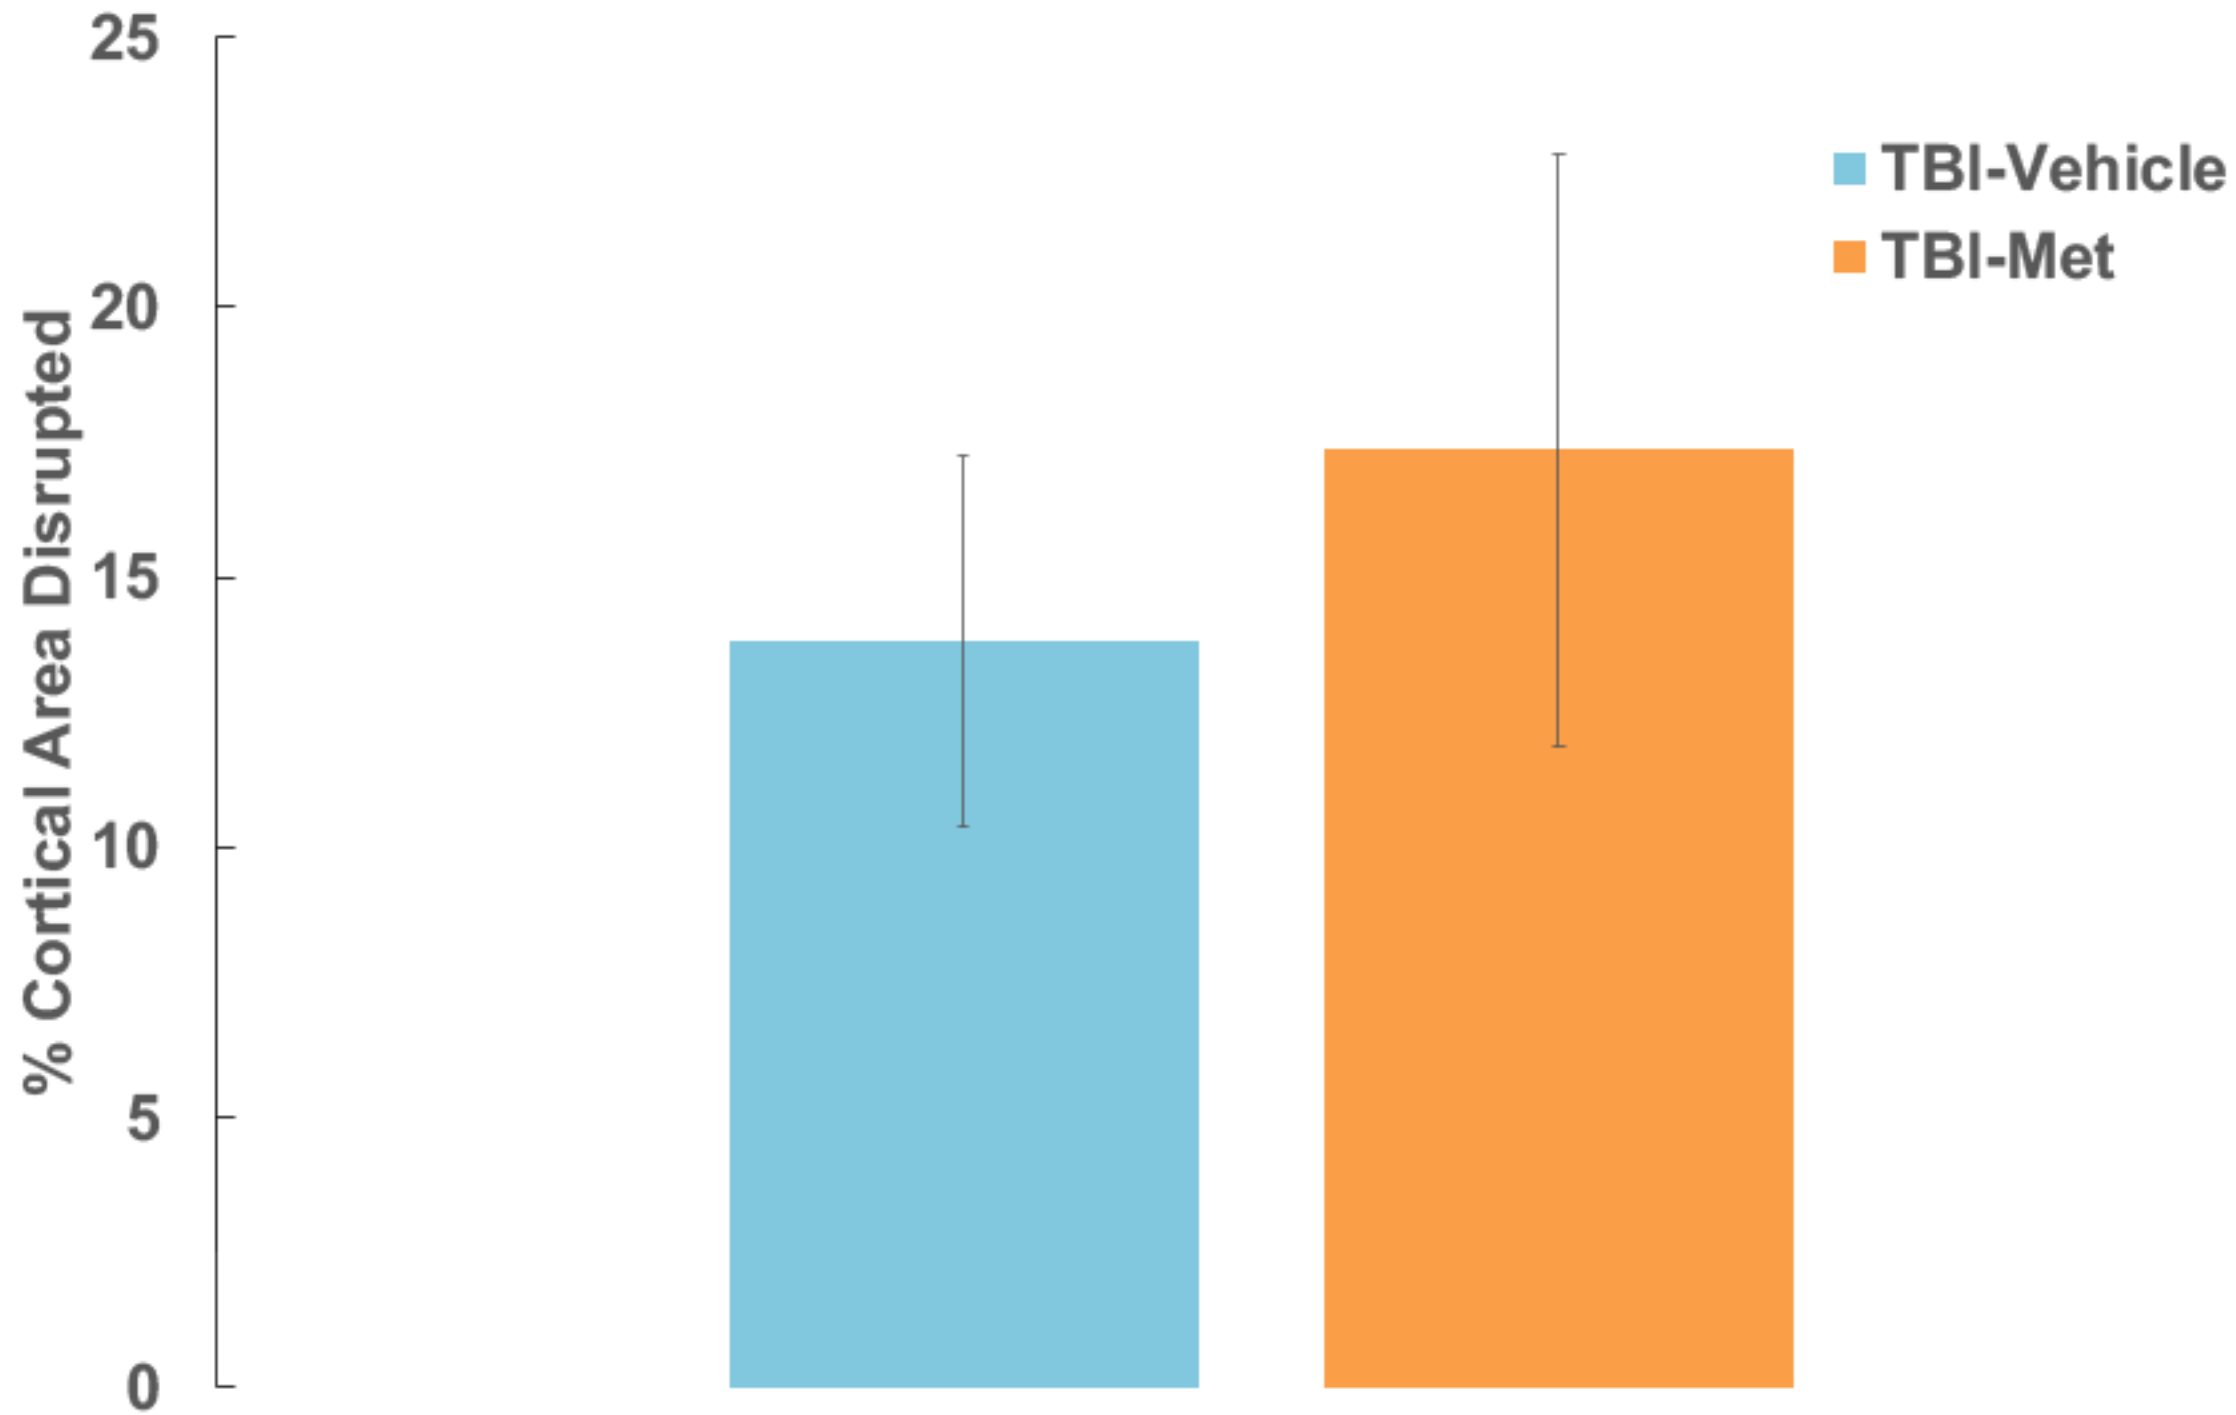



Supplemental Figure 6

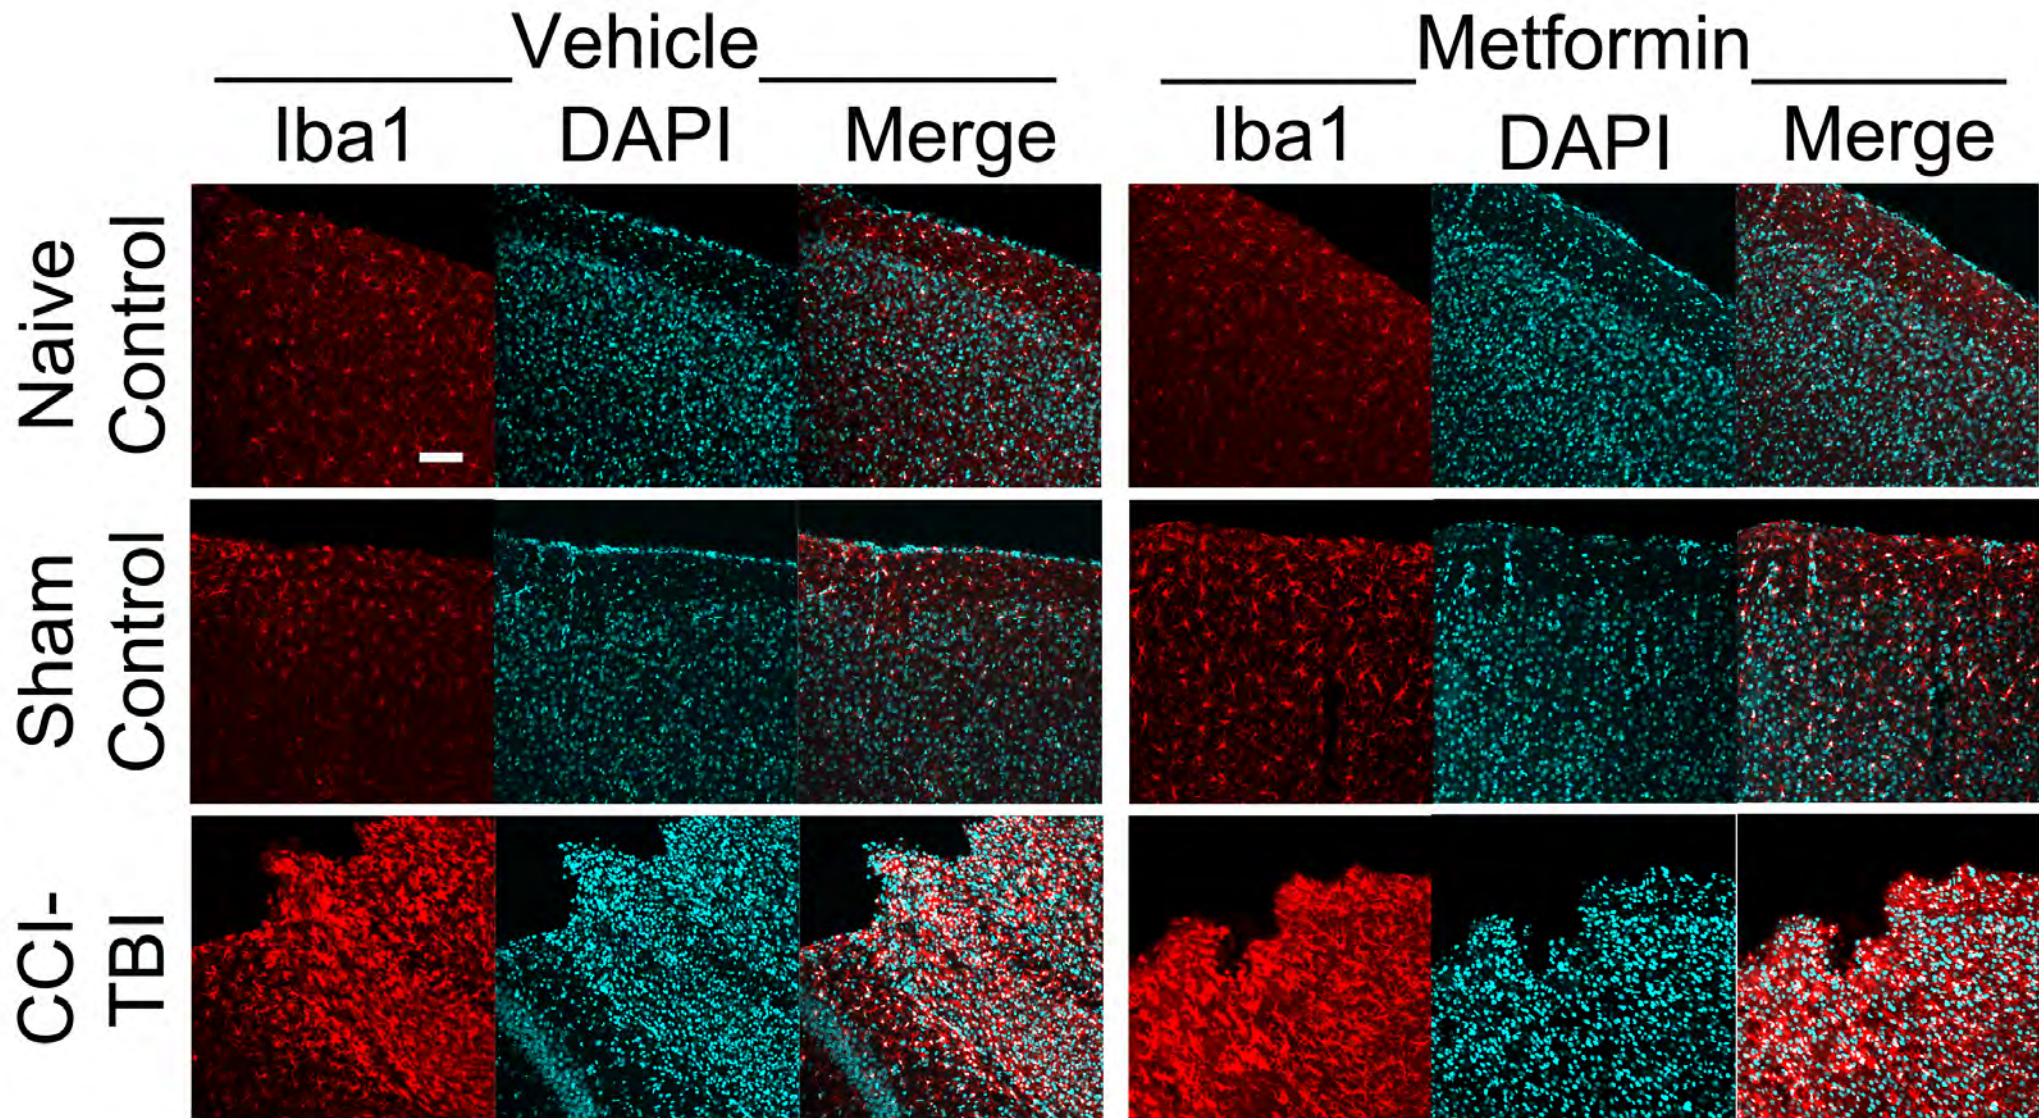

# Vehicle

# Metformin

**Naïve**

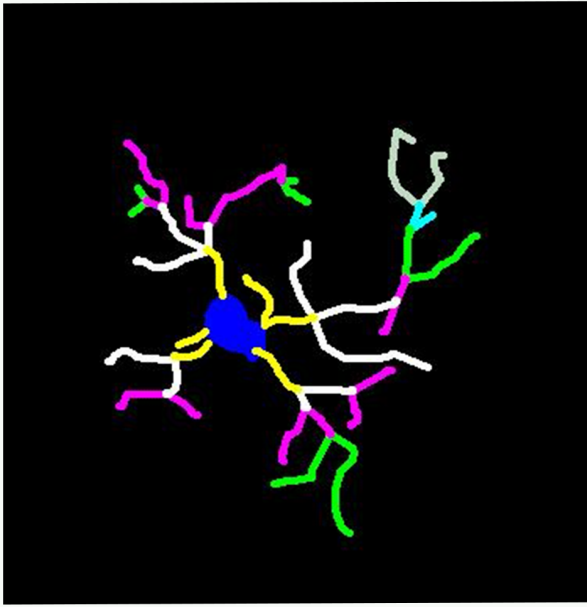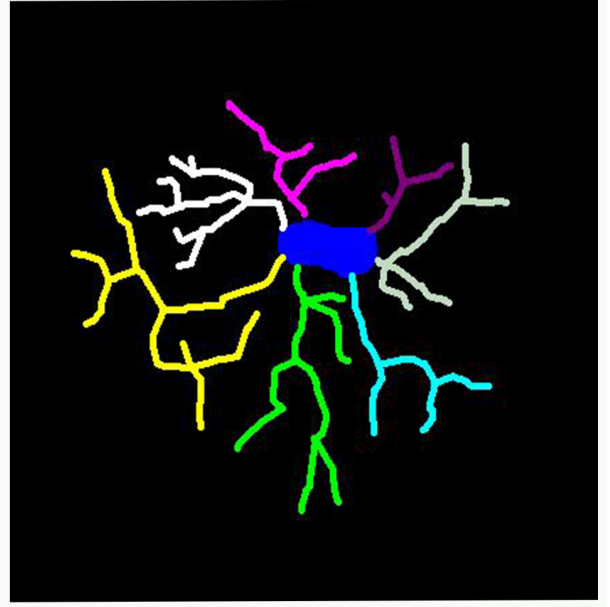

**Sham**

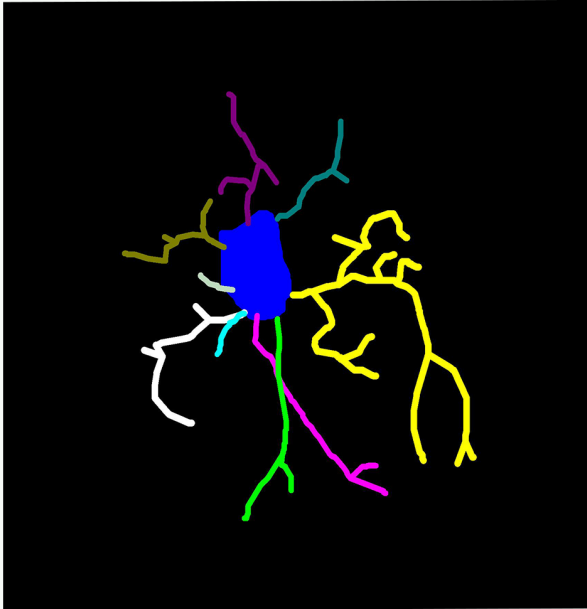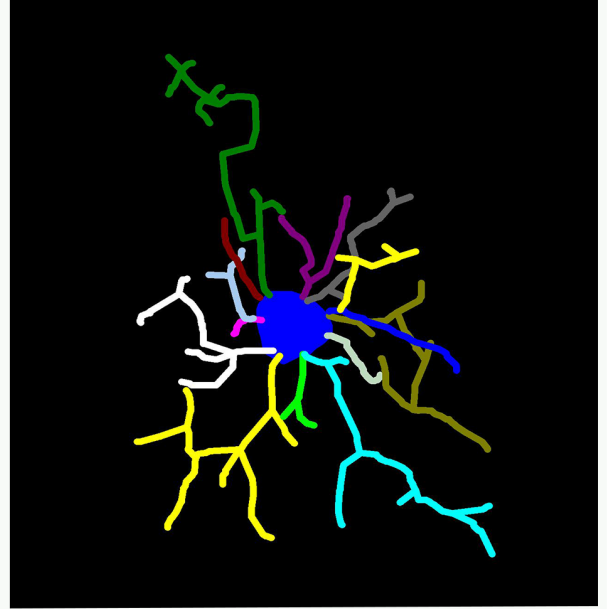

**TBI**

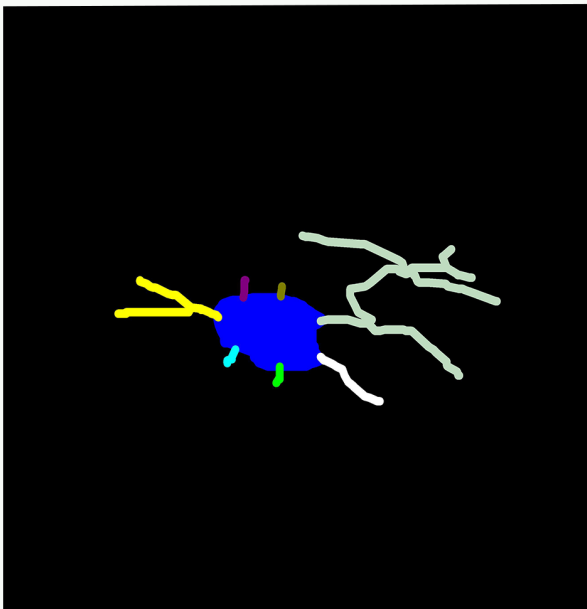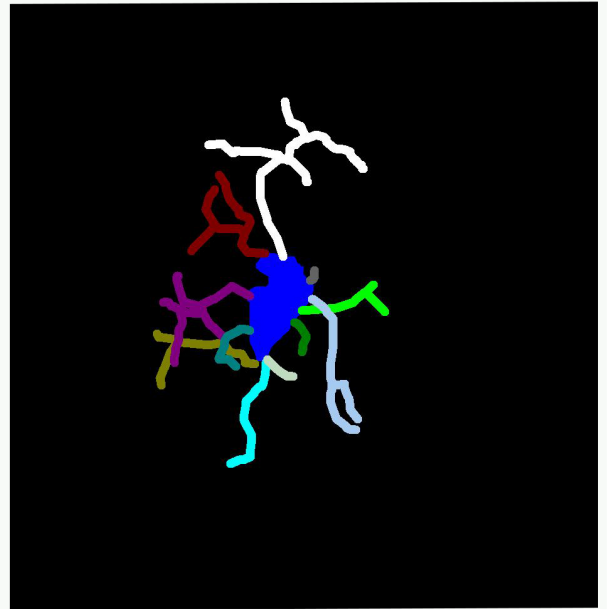

## Microglia Density (Ipsilaterally)

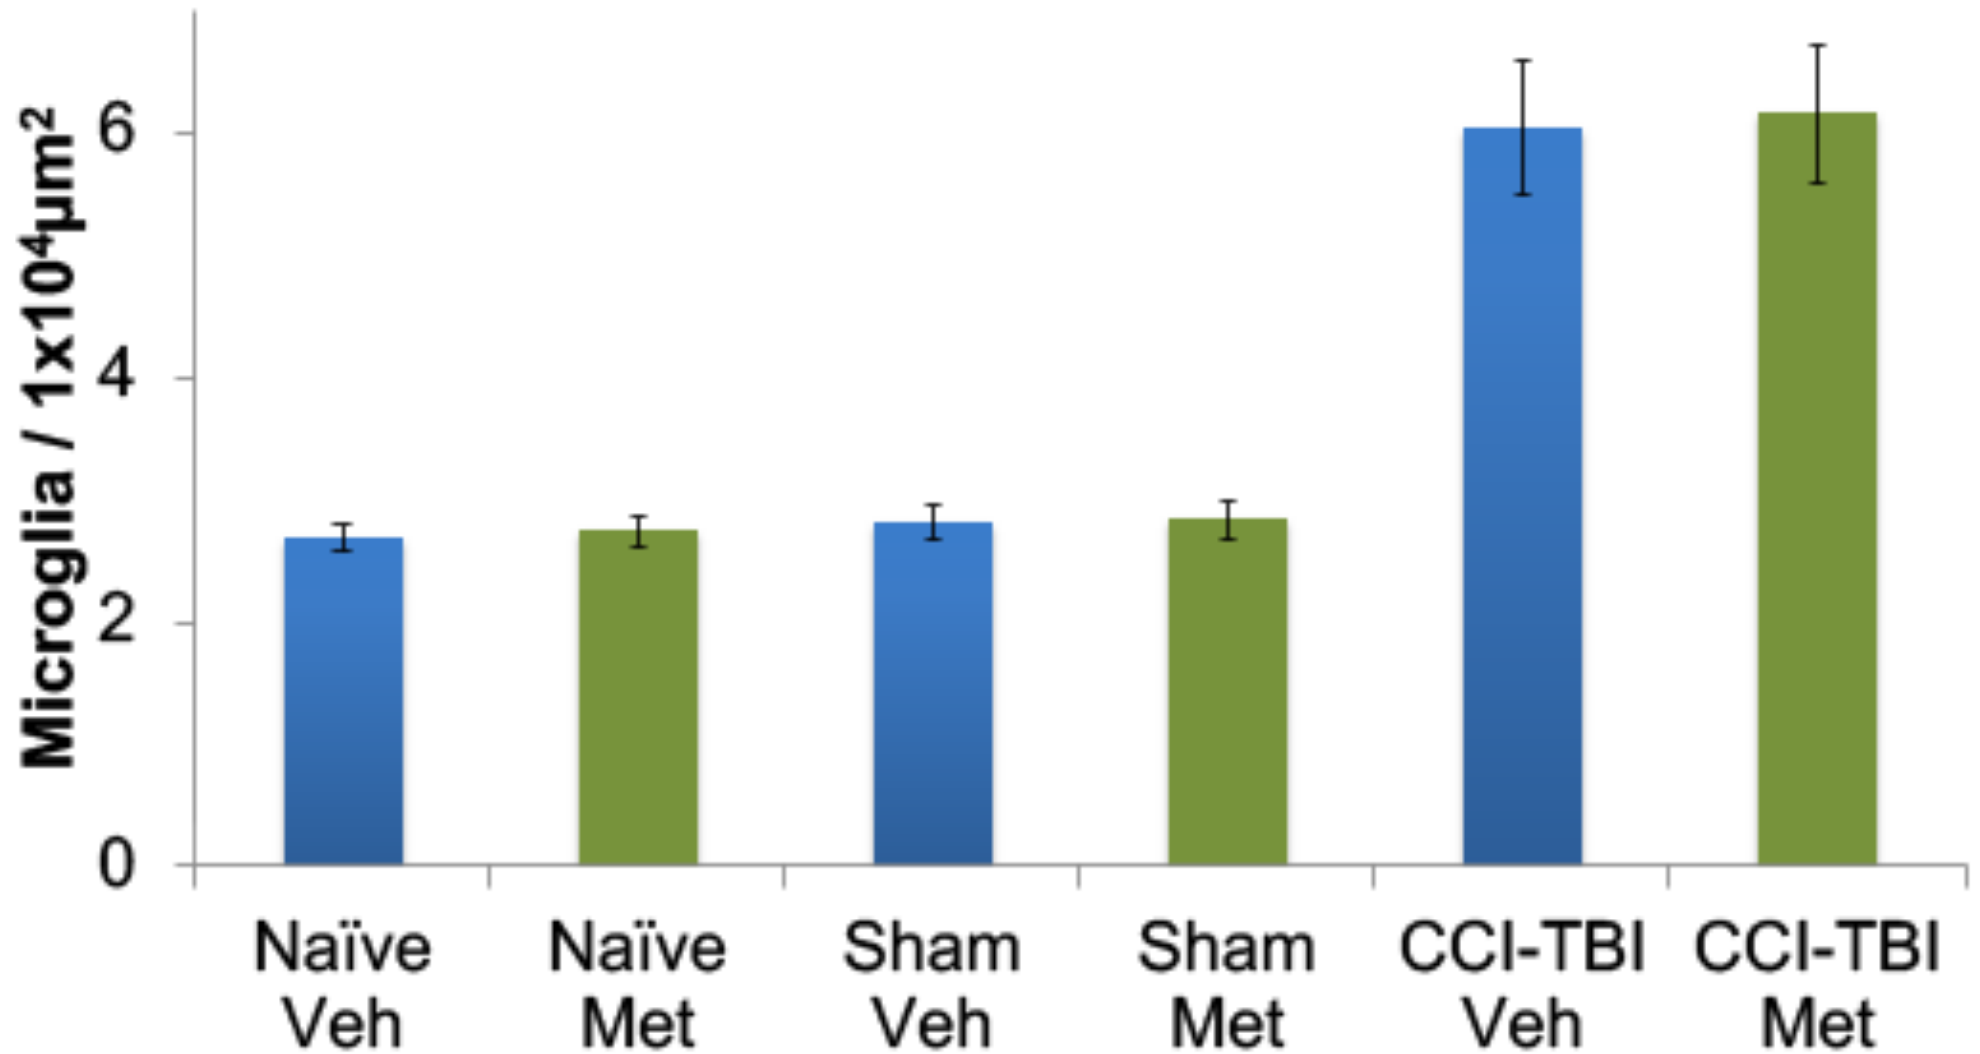

Supplemental Table 1: Two-Way ANOVA MORRIS WATER MAZE TEST

| dpi                                      | Surgery   | Treatment | n-mice | Mean   | Stand Dev | SEM   | df factor           | df  | F      | p       | Sig. |
|------------------------------------------|-----------|-----------|--------|--------|-----------|-------|---------------------|-----|--------|---------|------|
| Day 1                                    | Naive     | Vehicle   | 8      | 27.580 | 10.437    | 3.690 | Surgery             | 2   | 5.865  | 0.005   | **   |
|                                          | Naive     | Metformin | 10     | 32.234 | 8.864     | 2.803 | Treatment           | 1   | 0.921  | 0.341   |      |
|                                          | Sham      | Vehicle   | 12     | 27.571 | 11.624    | 3.355 | Surgery x Treatment | 2   | 1.560  | 0.219   |      |
|                                          | Sham      | Metformin | 12     | 36.471 | 17.062    | 4.925 | Within Groups       | 57  |        |         |      |
|                                          | TBI       | Vehicle   | 10     | 45.353 | 11.720    | 3.706 | Total               | 62  |        |         |      |
| Day 2                                    | Naive     | Vehicle   | 8      | 25.581 | 12.038    | 4.256 | Treatment           | 2   | 2.405  | 0.099   |      |
|                                          | Naive     | Metformin | 10     | 23.034 | 15.708    | 4.967 | Surgery             | 1   | 0.363  | 0.549   |      |
|                                          | Sham      | Vehicle   | 12     | 20.353 | 11.043    | 3.188 | Treatment x Surgery | 2   | 1.902  | 0.159   |      |
|                                          | Sham      | Metformin | 12     | 25.581 | 8.942     | 2.581 | Within Groups       | 57  |        |         |      |
|                                          | TBI       | Vehicle   | 10     | 36.223 | 16.828    | 5.322 | Total               | 62  |        |         |      |
| Day 3                                    | Naive     | Vehicle   | 8      | 24.003 | 9.312     | 3.292 | Treatment           | 2   | 4.705  | 0.013   | *    |
|                                          | Naive     | Metformin | 10     | 18.415 | 7.826     | 2.475 | Surgery             | 1   | 0.349  | 0.557   |      |
|                                          | Sham      | Vehicle   | 12     | 14.491 | 9.279     | 2.679 | Treatment x Surgery | 2   | 5.160  | 0.009   | **   |
|                                          | Sham      | Metformin | 12     | 24.151 | 9.668     | 2.791 | Within Groups       | 57  |        |         |      |
|                                          | TBI       | Vehicle   | 10     | 35.411 | 16.710    | 5.284 | Total               | 62  |        |         |      |
| Day 4                                    | Naive     | Vehicle   | 8      | 18.533 | 8.752     | 3.094 | Treatment           | 2   | 2.236  | 0.116   |      |
|                                          | Naive     | Metformin | 10     | 18.534 | 8.840     | 2.795 | Surgery             | 1   | 0.108  | 0.743   |      |
|                                          | Sham      | Vehicle   | 12     | 15.111 | 10.130    | 2.924 | Treatment x Surgery | 2   | 1.397  | 0.256   |      |
|                                          | Sham      | Metformin | 12     | 21.282 | 12.848    | 3.709 | Within Groups       | 57  |        |         |      |
|                                          | TBI       | Vehicle   | 10     | 26.703 | 9.243     | 2.923 | Total               | 62  |        |         |      |
| Day 5                                    | Naive     | Vehicle   | 8      | 15.866 | 10.814    | 3.823 | Treatment           | 2   | 3.335  | 0.043   | *    |
|                                          | Naive     | Metformin | 10     | 16.917 | 4.330     | 1.369 | Surgery             | 1   | 0.312  | 0.578   |      |
|                                          | Sham      | Vehicle   | 12     | 12.086 | 11.003    | 3.176 | Treatment x Surgery | 2   | 1.420  | 0.250   |      |
|                                          | Sham      | Metformin | 12     | 13.967 | 12.484    | 3.604 | Within Groups       | 57  |        |         |      |
|                                          | TBI       | Vehicle   | 10     | 25.307 | 13.218    | 4.180 | Total               | 62  |        |         |      |
| Day 6                                    | Naive     | Vehicle   | 8      | 10.411 | 3.709     | 1.311 | Treatment           | 2   | 2.486  | 0.092   |      |
|                                          | Naive     | Metformin | 10     | 11.090 | 3.296     | 1.042 | Surgery             | 1   | 1.532  | 0.221   |      |
|                                          | Sham      | Vehicle   | 12     | 13.134 | 8.798     | 2.540 | Treatment x Surgery | 2   | 2.400  | 0.100   |      |
|                                          | Sham      | Metformin | 12     | 14.001 | 9.540     | 2.754 | Within Groups       | 57  |        |         |      |
|                                          | TBI       | Vehicle   | 10     | 21.339 | 11.818    | 3.737 | Total               | 62  |        |         |      |
| All Days Combined                        | Naive     | Vehicle   | 8      | 20.329 | 5.010     | 1.771 | Surgery             | 2   | 7.502  | 0.001   | **   |
|                                          | Naive     | Metformin | 10     | 20.037 | 4.963     | 1.569 | Treatment           | 1   | 0.112  | 0.739   |      |
|                                          | Sham      | Vehicle   | 12     | 17.124 | 5.962     | 1.721 | Surgery x Treatment | 2   | 4.617  | 0.014   | *    |
|                                          | Sham      | Metformin | 12     | 22.575 | 8.666     | 2.502 | Within Groups       | 57  |        |         |      |
|                                          | TBI       | Vehicle   | 10     | 31.723 | 8.290     | 2.622 | Total               | 62  |        |         |      |
| 7dpi probe time target quad              | Naive     | Vehicle   | 8      | 23.835 | 6.198     | 2.191 | Surgery             | 5   | 0.017  | 1.000   |      |
|                                          | Naive     | Metformin | 10     | 22.410 | 5.801     | 1.834 | Treatment           | 3   | 39.333 | <0.0001 | ***  |
|                                          | Sham      | Vehicle   | 12     | 19.956 | 4.773     | 1.378 | Surgery x Treatment | 15  | 1.339  | 0.180   |      |
|                                          | Sham      | Metformin | 12     | 23.251 | 9.892     | 2.855 | Within Groups       | 228 |        |         |      |
|                                          | TBI       | Vehicle   | 10     | 22.485 | 10.129    | 3.203 | Total               | 251 |        |         |      |
| 7dpi probe crossings target quad         | Naive     | Vehicle   | 8      | 8.000  | 2.563     | 0.906 | Surgery             | 5   | 3.711  | 0.003   | **   |
|                                          | Naive     | Metformin | 10     | 8.100  | 1.792     | 0.567 | Treatment           | 3   | 11.955 | <0.0001 | ***  |
|                                          | Sham      | Vehicle   | 12     | 9.083  | 2.065     | 0.596 | Surgery x Treatment | 15  | 0.427  | 0.970   |      |
|                                          | Sham      | Metformin | 12     | 7.000  | 2.663     | 0.769 | Within Groups       | 228 |        |         |      |
|                                          | TBI       | Vehicle   | 10     | 7.200  | 1.549     | 0.490 | Total               | 251 |        |         |      |
| 7dpi probe Mean swim speed overall trial | Naive     | Vehicle   | 6      | 0.500  | 0.104     | 0.042 | Surgery             | 2   | 1.104  | 0.342   |      |
|                                          | Naive     | Metformin | 8      | 0.462  | 0.078     | 0.028 | Treatment           | 1   | <0.000 | 0.991   |      |
|                                          | Sham      | Vehicle   | 9      | 0.540  | 0.094     | 0.031 | Surgery x Treatment | 2   | 1.607  | 0.213   |      |
|                                          | Sham      | Metformin | 9      | 0.517  | 0.107     | 0.036 | Within Groups       | 39  |        |         |      |
|                                          | TBI       | Vehicle   | 7      | 0.476  | 0.119     | 0.045 | Total               | 44  |        |         |      |
| TBI                                      | Metformin | 6         | 0.560  | 0.059  | 0.024     | Total |                     |     |        |         |      |

| dpi                               | Post-Hoc                                 | Post hoc Tukey                 | Post hoc Sig. | Figure |
|-----------------------------------|------------------------------------------|--------------------------------|---------------|--------|
| Day 1                             | Naive Vehicle vs. Sham Vehicle           | 1.000                          |               |        |
|                                   | Naive Vehicle vs. TBI Vehicle            | 0.015                          | *             | 1C     |
|                                   | Sham Vehicle vs TBI Vehicle              | 0.006                          | **            | 1C     |
|                                   | Naive Metformin vs Sham Metformin        | 0.727                          |               |        |
|                                   | Naive Metformin vs TBI Metformin         | 0.291                          |               |        |
|                                   | Sham Metformin vs TBI Metformin          | 0.701                          |               |        |
|                                   | Naive: Vehicle vs Metformin              | 0.452                          |               |        |
|                                   | Sham: Vehicle vs Metformin               | 0.098                          |               |        |
|                                   | TBI: Vehicle vs Metformin                | 0.427                          |               |        |
|                                   | Day 2                                    | Naive Vehicle vs. Sham Vehicle | 0.655         |        |
| Naive Vehicle vs. TBI Vehicle     |                                          | 0.205                          |               |        |
| Sham Vehicle vs TBI Vehicle       |                                          | 0.016                          | *             | 1C     |
| Naive Metformin vs Sham Metformin |                                          | 0.891                          |               |        |
| Naive Metformin vs TBI Metformin  |                                          | 0.832                          |               |        |
| Sham Metformin vs TBI Metformin   |                                          | 0.990                          |               |        |
| Naive: Vehicle vs Metformin       |                                          | 0.681                          |               |        |
| Sham: Vehicle vs Metformin        |                                          | 0.329                          |               |        |
| TBI: Vehicle vs Metformin         |                                          | 0.087                          |               |        |
| Day 3                             |                                          | Naive Vehicle vs. Sham Vehicle | 0.174         |        |
|                                   | Naive Vehicle vs. TBI Vehicle            | 0.100                          |               |        |
|                                   | Sham Vehicle vs TBI Vehicle              | <0.0001                        | ***           | 1C     |
|                                   | Naive Metformin vs Sham Metformin        | 0.478                          |               |        |
|                                   | Naive Metformin vs TBI Metformin         | 0.538                          |               |        |
|                                   | Sham Metformin vs TBI Metformin          | 0.987                          |               |        |
|                                   | Naive: Vehicle vs Metformin              | 0.309                          |               |        |
|                                   | Sham: Vehicle vs Metformin               | 0.044                          | *             |        |
|                                   | TBI: Vehicle vs Metformin                | 0.024                          | *             | 1D     |
|                                   | Day 4                                    | Naive Vehicle vs. Sham Vehicle | 0.764         |        |
| Naive Vehicle vs. TBI Vehicle     |                                          | 0.249                          |               |        |
| Sham Vehicle vs TBI Vehicle       |                                          | 0.037                          | *             | 1C     |
| Naive Metformin vs Sham Metformin |                                          | 0.821                          |               |        |
| Naive Metformin vs TBI Metformin  |                                          | 0.706                          |               |        |
| Sham Metformin vs TBI Metformin   |                                          | 0.974                          |               |        |
| Naive: Vehicle vs Metformin       |                                          | 1.000                          |               |        |
| Sham: Vehicle vs Metformin        |                                          | 0.163                          |               |        |
| TBI: Vehicle vs Metformin         |                                          | 0.346                          |               |        |
| Day 5                             |                                          | Naive Vehicle vs. Sham Vehicle | 0.715         |        |
|                                   | Naive Vehicle vs. TBI Vehicle            | 0.153                          |               |        |
|                                   | Sham Vehicle vs TBI Vehicle              | 0.014                          | *             | 1C     |
|                                   | Naive Metformin vs Sham Metformin        | 0.792                          |               |        |
|                                   | Naive Metformin vs TBI Metformin         | 0.994                          |               |        |
|                                   | Sham Metformin vs TBI Metformin          | 0.716                          |               |        |
|                                   | Naive: Vehicle vs Metformin              | 0.835                          |               |        |
|                                   | Sham: Vehicle vs Metformin               | 0.664                          |               |        |
|                                   | TBI: Vehicle vs Metformin                | 0.093                          |               |        |
|                                   | Day 6                                    | Naive Vehicle vs. Sham Vehicle | 0.749         |        |
| Naive Vehicle vs. TBI Vehicle     |                                          | 0.018                          | *             | 1C     |
| Sham Vehicle vs TBI Vehicle       |                                          | 0.059                          |               |        |
| Naive Metformin vs Sham Metformin |                                          | 0.687                          |               |        |
| Naive Metformin vs TBI Metformin  |                                          | 0.931                          |               |        |
| Sham Metformin vs TBI Metformin   |                                          | 0.885                          |               |        |
| Naive: Vehicle vs Metformin       |                                          | 0.862                          |               |        |
| Sham: Vehicle vs Metformin        |                                          | 0.797                          |               |        |
| TBI: Vehicle vs Metformin         |                                          | 0.015                          | *             | 1D     |
| All Days Combined                 |                                          | Naive Vehicle vs. Sham Vehicle | 0.608         |        |
|                                   | Naive Vehicle vs. TBI Vehicle            | 0.005                          | **            | 1E     |
|                                   | Sham Vehicle vs TBI Vehicle              | <0.0001                        | ***           | 1E     |
|                                   | Naive Metformin vs Sham Metformin        | 0.701                          |               |        |
|                                   | Naive Metformin vs TBI Metformin         | 0.469                          |               |        |
|                                   | Sham Metformin vs TBI Metformin          | 0.912                          |               |        |
|                                   | Naive: Vehicle vs Metformin              | 0.934                          |               |        |
|                                   | Sham: Vehicle vs Metformin               | 0.075                          |               |        |
|                                   | TBI: Vehicle vs Metformin                | 0.017                          | *             | 1F     |
|                                   | 7dpi probe time target quad              | Naive Vehicle vs. Sham Vehicle | 0.936         |        |
| Naive Vehicle vs. TBI Vehicle     |                                          | 0.999                          |               |        |
| Sham Vehicle vs TBI Vehicle       |                                          | 0.983                          |               |        |
| Naive Metformin vs Sham Metformin |                                          | 1.000                          |               |        |
| Naive Metformin vs TBI Metformin  |                                          | 0.999                          |               |        |
| Sham Metformin vs TBI Metformin   |                                          | 0.988                          |               |        |
| Naive: Vehicle vs Metformin       |                                          | 0.999                          |               |        |
| Sham: Vehicle vs Metformin        |                                          | 0.946                          |               |        |
| TBI: Vehicle vs Metformin         |                                          | 0.998                          |               | SF2    |
| 7dpi probe crossings target quad  |                                          | Naive Vehicle vs. Sham Vehicle | 0.983         |        |
|                                   | Naive Vehicle vs. TBI Vehicle            | 0.996                          |               |        |
|                                   | Sham Vehicle vs TBI Vehicle              | 0.870                          |               |        |
|                                   | Naive Metformin vs Sham Metformin        | 0.977                          |               |        |
|                                   | Naive Metformin vs TBI Metformin         | 0.997                          |               |        |
|                                   | Sham Metformin vs TBI Metformin          | 0.673                          |               |        |
|                                   | Naive: Vehicle vs Metformin              | 1.000                          |               |        |
|                                   | Sham: Vehicle vs Metformin               | 0.828                          |               |        |
|                                   | TBI: Vehicle vs Metformin                | 0.917                          |               | SF2    |
|                                   | 7dpi probe Mean swim speed overall trial | Naive Vehicle vs. Sham Vehicle | 0.708         |        |
| Naive Vehicle vs. TBI Vehicle     |                                          | 0.900                          |               |        |
| Sham Vehicle vs TBI Vehicle       |                                          | 0.396                          |               |        |
| Naive Metformin vs Sham Metformin |                                          | 0.479                          |               |        |
| Naive Metformin vs TBI Metformin  |                                          | 0.159                          |               |        |
| Sham Metformin vs TBI Metformin   |                                          | 0.676                          |               |        |
| Naive: Vehicle vs Metformin       |                                          | 0.475                          |               |        |
| Sham: Vehicle vs Metformin        |                                          | 0.612                          |               |        |
| TBI: Vehicle vs Metformin         |                                          | 0.127                          |               | SF2    |

**Supplemental Table 2: Two-Way ANOVA POLE TEST OF MOTOR FUNCTION**

| dpi   | Surgery | Treatment | n-mice | Mean   | Stand Dev | SEM    | df factor           | df | F     | p     | Sig. |
|-------|---------|-----------|--------|--------|-----------|--------|---------------------|----|-------|-------|------|
| Day 1 | Naïve   | Vehicle   | 2      | 28.328 | 3.359     | 2.375  | Surgery             | 2  | 0.519 | 0.608 |      |
|       | Naïve   | Metformin | 2      | 28.368 | 9.251     | 6.542  | Treatment           | 1  | 0.155 | 0.700 |      |
|       | Sham    | Vehicle   | 3      | 25.456 | 9.157     | 5.287  | Surgery x Treatment | 2  | 0.111 | 0.896 |      |
|       | Sham    | Metformin | 3      | 33.693 | 19.588    | 11.309 | Within Groups       | 12 |       |       |      |
|       | TBI     | Vehicle   | 3      | 38.131 | 18.300    | 10.565 | Total               | 17 |       |       |      |
| Day 3 | TBI     | Metformin | 5      | 36.572 | 20.532    | 9.182  |                     |    |       |       |      |
|       | Naïve   | Vehicle   | 2      | 18.707 | 0.226     | 0.160  | Surgery             | 2  | 1.107 | 0.362 |      |
|       | Naïve   | Metformin | 2      | 16.355 | 5.560     | 3.932  | Treatment           | 1  | 0.007 | 0.936 |      |
|       | Sham    | Vehicle   | 3      | 16.182 | 8.030     | 4.636  | Surgery x Treatment | 2  | 0.020 | 0.980 |      |
|       | Sham    | Metformin | 3      | 17.181 | 4.563     | 2.634  | Within Groups       | 12 |       |       |      |
| Day 7 | TBI     | Vehicle   | 3      | 27.939 | 6.310     | 3.643  | Total               | 17 |       |       |      |
|       | TBI     | Metformin | 5      | 26.72  | 23.514    | 10.516 |                     |    |       |       |      |
|       | Naïve   | Vehicle   | 2      | 25.063 | 23.203    | 16.407 | Surgery             | 2  | 0.303 | 0.744 |      |
|       | Naïve   | Metformin | 2      | 18.442 | 3.071     | 2.172  | Treatment           | 1  | 0.181 | 0.678 |      |
|       | Sham    | Vehicle   | 3      | 36.434 | 23.393    | 13.506 | Surgery x Treatment | 2  | 0.336 | 0.721 |      |
| Day 7 | Sham    | Metformin | 3      | 25.008 | 12.310    | 7.107  | Within Groups       | 12 |       |       |      |
|       | TBI     | Vehicle   | 3      | 24.329 | 7.529     | 4.347  | Total               | 17 |       |       |      |
|       | TBI     | Metformin | 5      | 28.515 | 21.056    | 9.416  |                     |    |       |       |      |

| dpi   | Post-Hoc                          | Post hoc Tukey | Post hoc Sig. |
|-------|-----------------------------------|----------------|---------------|
| Day 1 | Naïve Vehicle vs. Sham Vehicle    | 0.981          |               |
|       | Naïve Vehicle vs. TBI Vehicle     | 0.802          |               |
|       | Sham Vehicle vs TBI Vehicle       | 0.636          |               |
|       | Naïve Metformin vs Sham Metformin | 0.936          |               |
|       | Naïve Metformin vs TBI Metformin  | 0.831          |               |
|       | Sham Metformin vs TBI Metformin   | 0.970          |               |
|       | Naïve: Vehicle vs Metformin       | 0.998          |               |
|       | Sham: Vehicle vs Metformin        | 0.559          |               |
| Day 3 | TBI: Vehicle vs Metformin         | 0.901          |               |
|       | Naïve Vehicle vs. Sham Vehicle    | 0.980          |               |
|       | Naïve Vehicle vs. TBI Vehicle     | 0.767          |               |
|       | Sham Vehicle vs TBI Vehicle       | 0.591          |               |
|       | Naïve Metformin vs Sham Metformin | 0.998          |               |
|       | Naïve Metformin vs TBI Metformin  | 0.675          |               |
|       | Sham Metformin vs TBI Metformin   | 0.647          |               |
|       | Naïve: Vehicle vs Metformin       | 0.873          |               |
| Day 7 | Sham: Vehicle vs Metformin        | 0.934          |               |
|       | TBI: Vehicle vs Metformin         | 0.910          |               |
|       | Naïve Vehicle vs. Sham Vehicle    | 0.770          |               |
|       | Naïve Vehicle vs. TBI Vehicle     | 0.999          |               |
|       | Sham Vehicle vs TBI Vehicle       | 0.693          |               |
|       | Naïve Metformin vs Sham Metformin | 0.915          |               |
|       | Naïve Metformin vs TBI Metformin  | 0.783          |               |
|       | Sham Metformin vs TBI Metformin   | 0.961          |               |
| Day 7 | Naïve: Vehicle vs Metformin       | 0.717          |               |
|       | Sham: Vehicle vs Metformin        | 0.449          |               |
|       | TBI: Vehicle vs Metformin         | 0.754          |               |

Supplemental Table 3: Two-Way ANOVA NESTING TEST

| dpi   | Surgery | Treatment | n-mice | Mean  | Stand Dev | SEM   | df factor           | df | F     | p     | Sig. |
|-------|---------|-----------|--------|-------|-----------|-------|---------------------|----|-------|-------|------|
| Day 1 | Naïve   | Vehicle   | 7      | 4.571 | 0.535     | 0.202 | Surgery             | 2  | 6.557 | 0.003 | **   |
|       | Naïve   | Metformin | 9      | 4.056 | 1.130     | 0.377 | Treatment           | 1  | 1.735 | 0.194 |      |
|       | Sham    | Vehicle   | 10     | 4.150 | 1.203     | 0.380 | Surgery x Treatment | 2  | 0.206 | 0.814 |      |
|       | Sham    | Metformin | 10     | 3.600 | 0.876     | 0.277 | Within Groups       | 48 |       |       |      |
|       | TBI     | Vehicle   | 9      | 3.000 | 1.677     | 0.559 | Total               | 53 |       |       |      |
|       | TBI     | Metformin | 9      | 2.556 | 1.685     | 0.562 |                     |    |       |       |      |
| Day 2 | Naïve   | Vehicle   | 8      | 4.688 | 0.458     | 0.162 | Surgery             | 2  | 2.994 | 0.058 |      |
|       | Naïve   | Metformin | 10     | 4.500 | 0.667     | 0.211 | Treatment           | 1  | 0.373 | 0.544 |      |
|       | Sham    | Vehicle   | 12     | 4.083 | 0.925     | 0.267 | Surgery x Treatment | 2  | 0.632 | 0.535 |      |
|       | Sham    | Metformin | 12     | 4.125 | 0.882     | 0.255 | Within Groups       | 57 |       |       |      |
|       | TBI     | Vehicle   | 10     | 3.600 | 1.125     | 0.356 | Total               | 62 |       |       |      |
|       | TBI     | Metformin | 11     | 4.091 | 1.221     | 0.368 |                     |    |       |       |      |
| Day 3 | Naïve   | Vehicle   | 8      | 4.563 | 0.496     | 0.175 | Surgery             | 2  | 0.169 | 0.845 |      |
|       | Naïve   | Metformin | 10     | 4.300 | 1.252     | 0.396 | Treatment           | 1  | 0.005 | 0.945 |      |
|       | Sham    | Vehicle   | 12     | 4.333 | 1.155     | 0.333 | Surgery x Treatment | 2  | 0.361 | 0.699 |      |
|       | Sham    | Metformin | 12     | 4.333 | 0.778     | 0.225 | Within Groups       | 57 |       |       |      |
|       | TBI     | Vehicle   | 10     | 4.100 | 0.994     | 0.314 | Total               | 62 |       |       |      |
|       | TBI     | Metformin | 11     | 4.364 | 0.809     | 0.244 |                     |    |       |       |      |
| Day 4 | Naïve   | Vehicle   | 8      | 4.688 | 0.458     | 0.162 | Surgery             | 2  | 0.142 | 0.868 |      |
|       | Naïve   | Metformin | 10     | 4.750 | 0.540     | 0.171 | Treatment           | 1  | 0.573 | 0.452 |      |
|       | Sham    | Vehicle   | 12     | 4.542 | 0.542     | 0.156 | Surgery x Treatment | 2  | 0.016 | 0.984 |      |
|       | Sham    | Metformin | 12     | 4.708 | 0.865     | 0.250 | Within Groups       | 57 |       |       |      |
|       | TBI     | Vehicle   | 10     | 4.550 | 0.956     | 0.302 | Total               | 62 |       |       |      |
|       | TBI     | Metformin | 11     | 4.682 | 0.462     | 0.139 |                     |    |       |       |      |
| Day 5 | Naïve   | Vehicle   | 8      | 4.750 | 0.463     | 0.164 | Surgery             | 2  | 0.308 | 0.736 |      |
|       | Naïve   | Metformin | 10     | 4.650 | 0.474     | 0.150 | Treatment           | 1  | 0.134 | 0.716 |      |
|       | Sham    | Vehicle   | 12     | 4.458 | 0.722     | 0.208 | Surgery x Treatment | 2  | 0.285 | 0.753 |      |
|       | Sham    | Metformin | 12     | 4.708 | 0.396     | 0.114 | Within Groups       | 57 |       |       |      |
|       | TBI     | Vehicle   | 10     | 4.500 | 0.972     | 0.307 | Total               | 62 |       |       |      |
|       | TBI     | Metformin | 11     | 4.500 | 1.204     | 0.363 |                     |    |       |       |      |
| Day 6 | Naïve   | Vehicle   | 8      | 5.000 | 0.000     | 0.000 | Surgery             | 2  | 2.624 | 0.081 |      |
|       | Naïve   | Metformin | 10     | 4.950 | 0.158     | 0.050 | Treatment           | 1  | 0.992 | 0.323 |      |
|       | Sham    | Vehicle   | 12     | 4.833 | 0.326     | 0.094 | Surgery x Treatment | 2  | 3.439 | 0.039 | *    |
|       | Sham    | Metformin | 12     | 4.708 | 0.450     | 0.130 | Within Groups       | 57 |       |       |      |
|       | TBI     | Vehicle   | 10     | 4.450 | 0.685     | 0.217 | Total               | 62 |       |       |      |
|       | TBI     | Metformin | 11     | 4.909 | 0.302     | 0.091 |                     |    |       |       |      |
| Day 7 | Naïve   | Vehicle   | 8      | 4.750 | 0.463     | 0.164 | Surgery             | 2  | 0.074 | 0.928 |      |
|       | Naïve   | Metformin | 10     | 4.550 | 0.832     | 0.263 | Treatment           | 1  | 0.175 | 0.677 |      |
|       | Sham    | Vehicle   | 12     | 4.708 | 0.450     | 0.130 | Surgery x Treatment | 2  | 0.635 | 0.534 |      |
|       | Sham    | Metformin | 12     | 4.542 | 0.722     | 0.208 | Within Groups       | 57 |       |       |      |
|       | TBI     | Vehicle   | 10     | 4.600 | 0.516     | 0.163 | Total               | 62 |       |       |      |
|       | TBI     | Metformin | 11     | 4.773 | 0.410     | 0.124 |                     |    |       |       |      |

| dpi   | Post-Hoc                          | Post hoc Tukey | Post hoc Sig. | Figure |
|-------|-----------------------------------|----------------|---------------|--------|
| Day 1 | Naïve Vehicle vs. Sham Vehicle    | 0.779          |               |        |
|       | Naïve Vehicle vs. TBI Vehicle     | 0.045          | *             | 1C     |
|       | Sham Vehicle vs TBI Vehicle       | 0.129          |               |        |
|       | Naïve Metformin vs Sham Metformin | 0.716          |               |        |
|       | Naïve Metformin vs TBI Metformin  | 0.040          | *             | 1D     |
|       | Sham Metformin vs TBI Metformin   | 0.182          |               |        |
|       | Naïve: Vehicle vs Metformin       | 0.423          |               |        |
|       | Sham: Vehicle vs Metformin        | 0.337          |               |        |
|       | TBI: Vehicle vs Metformin         | 0.460          |               |        |
|       |                                   |                |               |        |
| Day 2 | Naïve Vehicle vs. Sham Vehicle    | 0.339          |               |        |
|       | Naïve Vehicle vs. TBI Vehicle     | 0.045          | *             | 1C     |
|       | Sham Vehicle vs TBI Vehicle       | 0.453          |               |        |
|       | Naïve Metformin vs Sham Metformin | 0.619          |               |        |
|       | Naïve Metformin vs TBI Metformin  | 0.579          |               |        |
|       | Sham Metformin vs TBI Metformin   | 0.996          |               |        |
|       | Naïve: Vehicle vs Metformin       | 0.674          |               |        |
|       | Sham: Vehicle vs Metformin        | 0.913          |               |        |
|       | TBI: Vehicle vs Metformin         | 0.234          |               |        |
|       |                                   |                |               |        |
| Day 3 | Naïve Vehicle vs. Sham Vehicle    | 0.861          |               |        |
|       | Naïve Vehicle vs. TBI Vehicle     | 0.571          |               |        |
|       | Sham Vehicle vs TBI Vehicle       | 0.838          |               |        |
|       | Naïve Metformin vs Sham Metformin | 0.996          |               |        |
|       | Naïve Metformin vs TBI Metformin  | 0.988          |               |        |
|       | Sham Metformin vs TBI Metformin   | 0.997          |               |        |
|       | Naïve: Vehicle vs Metformin       | 0.567          |               |        |
|       | Sham: Vehicle vs Metformin        | 1.000          |               |        |
|       | TBI: Vehicle vs Metformin         | 0.532          |               |        |
|       |                                   |                |               |        |
| Day 4 | Naïve Vehicle vs. Sham Vehicle    | 0.884          |               |        |
|       | Naïve Vehicle vs. TBI Vehicle     | 0.903          |               |        |
|       | Sham Vehicle vs TBI Vehicle       | 1.000          |               |        |
|       | Naïve Metformin vs Sham Metformin | 0.989          |               |        |
|       | Naïve Metformin vs TBI Metformin  | 0.971          |               |        |
|       | Sham Metformin vs TBI Metformin   | 0.995          |               |        |
|       | Naïve: Vehicle vs Metformin       | 0.846          |               |        |
|       | Sham: Vehicle vs Metformin        | 0.547          |               |        |
|       | TBI: Vehicle vs Metformin         | 0.656          |               |        |
|       |                                   |                |               |        |
| Day 5 | Naïve Vehicle vs. Sham Vehicle    | 0.688          |               |        |
|       | Naïve Vehicle vs. TBI Vehicle     | 0.775          |               |        |
|       | Sham Vehicle vs TBI Vehicle       | 0.991          |               |        |
|       | Naïve Metformin vs Sham Metformin | 0.983          |               |        |
|       | Naïve Metformin vs TBI Metformin  | 0.897          |               |        |
|       | Sham Metformin vs TBI Metformin   | 0.795          |               |        |
|       | Naïve: Vehicle vs Metformin       | 0.786          |               |        |
|       | Sham: Vehicle vs Metformin        | 0.431          |               |        |
|       | TBI: Vehicle vs Metformin         | 1.000          |               |        |
|       |                                   |                |               |        |
| Day 6 | Naïve Vehicle vs. Sham Vehicle    | 0.623          |               |        |
|       | Naïve Vehicle vs. TBI Vehicle     | 0.012          | *             | 1C     |
|       | Sham Vehicle vs TBI Vehicle       | 0.066          |               |        |
|       | Naïve Metformin vs Sham Metformin | 0.327          |               |        |
|       | Naïve Metformin vs TBI Metformin  | 0.969          |               |        |
|       | Sham Metformin vs TBI Metformin   | 0.442          |               |        |
|       | Naïve: Vehicle vs Metformin       | 0.789          |               |        |
|       | Sham: Vehicle vs Metformin        | 0.438          |               |        |
|       | TBI: Vehicle vs Metformin         | 0.010          | **            | 1B     |
|       |                                   |                |               |        |
| Day 7 | Naïve Vehicle vs. Sham Vehicle    | 0.987          |               |        |
|       | Naïve Vehicle vs. TBI Vehicle     | 0.853          |               |        |
|       | Sham Vehicle vs TBI Vehicle       | 0.903          |               |        |
|       | Naïve Metformin vs Sham Metformin | 0.999          |               |        |
|       | Naïve Metformin vs TBI Metformin  | 0.664          |               |        |
|       | Sham Metformin vs TBI Metformin   | 0.617          |               |        |
|       | Naïve: Vehicle vs Metformin       | 0.477          |               |        |
|       | Sham: Vehicle vs Metformin        | 0.491          |               |        |
|       | TBI: Vehicle vs Metformin         | 0.505          |               |        |
|       |                                   |                |               |        |

**Supplemental Table 4: Two-Way ANOVA IMMUNOHISTOCHEMISTRY**

| Surgery | Treatment | n-mice | n-image | Mean  | Stand Dev | SEM   | df factor           | df  | F      | p       | Sig. |
|---------|-----------|--------|---------|-------|-----------|-------|---------------------|-----|--------|---------|------|
| Naïve   | Vehicle   | 8      | 30      | 0.027 | 0.011     | 0.001 | Surgery x Treatment | 2   | 0.013  | 0.987   |      |
| Naïve   | Metformin | 10     | 27      | 0.027 | 0.011     | 0.001 | Surgery             | 2   | 61.270 | <0.0001 | *    |
| Sham    | Vehicle   | 11     | 33      | 0.028 | 0.015     | 0.001 | Treatment           | 1   | 0.047  | 0.828   |      |
| Sham    | Metformin | 12     | 36      | 0.028 | 0.016     | 0.002 | Residual            | 570 |        |         |      |
| TBI     | Vehicle   | 10     | 31      | 0.060 | 0.053     | 0.005 |                     |     |        |         |      |
| TBI     | Metformin | 10     | 35      | 0.062 | 0.057     | 0.006 |                     |     |        |         |      |

| Post-Hoc                          | Post hoc Tukey | Post hoc Sig. |
|-----------------------------------|----------------|---------------|
| Naïve Vehicle vs. Sham Vehicle    | 0.9998         |               |
| Naïve Vehicle vs. TBI Vehicle     | <0.0001        | ***           |
| Sham Vehicle vs TBI Vehicle       | <0.0001        | ***           |
| Naïve Metformin vs Sham Metformin | >0.9999        |               |
| Naïve Metformin vs TBI Metformin  | <0.0001        | ***           |
| Sham Metformin vs TBI Metformin   | <0.0001        | ***           |
| Naïve: Vehicle vs Metformin       | >0.9999        |               |
| Sham: Vehicle vs Metformin        | >0.9999        |               |
| TBI: Vehicle vs Metformin         | 0.9999         |               |

Supplemental Table 5 Type III Test of Fixed Effects/Mixed Model MICROGLIA DEVELOPMENTAL MORPHOLOGY - STRUCTURAL CHARACTERISTICS

| Experimental Group: TBI | n-mice | n-microglia |  |
|-------------------------|--------|-------------|--|
| Vehicle                 | 10     | 120         |  |
| Metformin               | 12     | 144         |  |

  

| Morphology<br>Structural Characteristics of Branching | Experimental Group: TBI | Mean    | Stand Dev | SEM   | Coeff Var | Tests of Fixed Effects |              |                |       |       | Figure |      |
|-------------------------------------------------------|-------------------------|---------|-----------|-------|-----------|------------------------|--------------|----------------|-------|-------|--------|------|
|                                                       |                         |         |           |       |           | Source                 | Numerator df | Denominator df | F     | p     |        | Sig. |
| Intersections - Radii 30                              | Vehicle                 | 1.490   | 1.983     | 0.181 | 1.230     | Treatment              | 1            | 262.000        | 6.607 | 0.019 | *      | 4B   |
|                                                       | Metformin               | 2.190   | 2.700     | 0.225 | 1.329     |                        |              |                |       |       |        |      |
| Avg. Branch Length - SUM TOTAL                        | Vehicle                 | 210.458 | 94.596    | 8.635 | 0.449     | Treatment              | 1            | 262.000        | 4.258 | 0.040 | *      | 4F   |
|                                                       | Metformin               | 237.033 | 111.556   | 9.296 | 0.471     |                        |              |                |       |       |        |      |
| Nodes - Radii 15                                      | Vehicle                 | 3.030   | 1.756     | 0.160 | 0.580     | Treatment              | 1            | 262.000        | 5.241 | 0.023 | *      | 4H   |
|                                                       | Metformin               | 3.620   | 2.341     | 0.195 | 0.647     |                        |              |                |       |       |        |      |
| Nodes - Radii 20                                      | Vehicle                 | 2.280   | 1.919     | 0.175 | 0.841     | Treatment              | 1            | 262.000        | 6.928 | 0.009 | **     | 4H   |
|                                                       | Metformin               | 2.940   | 2.121     | 0.177 | 0.720     |                        |              |                |       |       |        |      |
| Nodes - Radii 25                                      | Vehicle                 | 1.310   | 1.565     | 0.143 | 1.196     | Treatment              | 1            | 262.000        | 4.799 | 0.029 | *      | 4H   |
|                                                       | Metformin               | 1.760   | 1.774     | 0.148 | 1.006     |                        |              |                |       |       |        |      |
| Nodes - Radii 30                                      | Vehicle                 | 0.540   | 0.916     | 0.084 | 1.691     | Treatment              | 1            | 262.000        | 6.319 | 0.013 | *      | 4H   |
|                                                       | Metformin               | 0.910   | 1.369     | 0.114 | 1.504     |                        |              |                |       |       |        |      |
| Nodes - SUM TOTAL                                     | Vehicle                 | 9.408   | 4.949     | 0.452 | 0.526     | Treatment              | 1            | 74.322         | 6.412 | 0.013 | *      | 4I   |
|                                                       | Metformin               | 11.826  | 6.933     | 0.578 | 0.586     |                        |              |                |       |       |        |      |
| Endings - Radii 10                                    | Vehicle                 | 2.330   | 1.600     | 0.146 | 0.686     | Treatment              | 1            | 262.000        | 4.680 | 0.031 | *      | 4K   |
|                                                       | Metformin               | 2.820   | 1.981     | 0.165 | 0.703     |                        |              |                |       |       |        |      |
| Endings - Radii 25                                    | Vehicle                 | 3.490   | 2.580     | 0.236 | 0.739     | Treatment              | 1            | 262.000        | 4.681 | 0.031 | *      | 4K   |
|                                                       | Metformin               | 4.220   | 2.806     | 0.234 | 0.666     |                        |              |                |       |       |        |      |
| Endings - SUM TOTAL                                   | Vehicle                 | 19.692  | 6.504     | 0.594 | 0.330     | Treatment              | 1            | 491.337        | 5.642 | 0.018 | *      | 4L   |
|                                                       | Metformin               | 22.431  | 8.458     | 0.705 | 0.377     |                        |              |                |       |       |        |      |

  

| Morphology<br>Structural Characteristics of Complexity | Experimental Group: TBI | Mean   | Stand Dev | SEM   | Coeff Var | Tests of Fixed Effects |              |                |       |       | Figure |      |
|--------------------------------------------------------|-------------------------|--------|-----------|-------|-----------|------------------------|--------------|----------------|-------|-------|--------|------|
|                                                        |                         |        |           |       |           | Source                 | Numerator df | Denominator df | F     | p     |        | Sig. |
| Primary                                                | Vehicle                 |        |           |       |           |                        |              |                |       |       |        | 5A-C |
|                                                        | Metformin               |        |           |       |           |                        |              |                |       |       |        | NS   |
| Secondary                                              | Vehicle                 |        |           |       |           |                        |              |                |       |       |        | 5D-F |
|                                                        | Metformin               |        |           |       |           |                        |              |                |       |       |        | NS   |
| Tertiary - Radii 20                                    | Vehicle                 | 12.965 | 11.498    | 1.050 | 0.887     | Treatment              | 1            | 262.000        | 4.249 | 0.040 | *      | 5H   |
|                                                        | Metformin               | 16.117 | 13.050    | 1.088 | 0.810     |                        |              |                |       |       |        |      |
| Tertiary - SUM TOTAL                                   | Vehicle                 | 39.639 | 31.447    | 2.621 | 0.793     | Treatment              | 1            | 262.000        | 6.205 | 0.013 | *      | 5I   |
|                                                        | Metformin               | 49.846 | 34.503    | 2.875 | 0.692     |                        |              |                |       |       |        |      |
| Quarternary - Radii 20                                 | Vehicle                 | 4.007  | 6.025     | 0.550 | 1.503     | Treatment              | 1            | 262.000        | 7.897 | 0.005 | **     | 5K   |
|                                                        | Metformin               | 6.783  | 9.317     | 0.776 | 1.374     |                        |              |                |       |       |        |      |
| Quarternary - Radii 25                                 | Vehicle                 | 5.361  | 7.805     | 0.650 | 1.456     | Treatment              | 1            | 262.000        | 4.832 | 0.029 | *      | 5K   |
|                                                        | Metformin               | 7.831  | 10.034    | 0.836 | 1.281     |                        |              |                |       |       |        |      |
| Quarternary - SUM TOTAL                                | Vehicle                 | 19.203 | 22.767    | 1.897 | 1.186     | Treatment              | 1            | 262.000        | 6.701 | 0.010 | **     | 5L   |
|                                                        | Metformin               | 27.420 | 27.877    | 2.323 | 1.017     |                        |              |                |       |       |        |      |



**Supplemental Table 6 Type III Test of Fixed Effects/Mixed Model ASTROCYTE (GFAP+) FLUORESCENT INTENSITY**

| Surgery | Treatment | n-mice | n-images | Mean   | Stand Dev | SEM   | Coeff Var | df factor           | df | F       | p       | Sig. |
|---------|-----------|--------|----------|--------|-----------|-------|-----------|---------------------|----|---------|---------|------|
| Naive   | Vehicle   | 8      | 24       | 5.115  | 3.661     | 0.747 | 0.716     | Intercept           | 1  | 298.755 | <0.0001 | ***  |
| Naive   | Metformin | 10     | 27       | 6.815  | 4.093     | 0.788 | 0.601     | Surgery             | 3  | 37.548  | <0.0001 | ***  |
| Sham    | Vehicle   | 11     | 32       | 8.308  | 6.220     | 1.100 | 0.749     | Treatment           | 2  | 2.001   | 0.159   | N.S  |
| Sham    | Metformin | 12     | 37       | 9.038  | 7.959     | 1.308 | 0.881     | Surgery + Treatment | 5  |         |         |      |
| TBI     | Vehicle   | 10     | 31       | 17.379 | 8.575     | 1.540 | 0.493     |                     |    |         |         |      |
| TBI     | Metformin | 11     | 33       | 20.449 | 14.902    | 2.594 | 0.729     |                     |    |         |         |      |

| Post-Hoc                    | Test of Fixed Effects | Post hoc Sig. |
|-----------------------------|-----------------------|---------------|
| Naive: Vehicle vs Metformin | 0.126                 | N.S           |
| Sham: Vehicle vs Metformin  | 0.676                 | N.S           |
| TBI: Vehicle vs Metformin   | >0.9999               | N.S           |

**Supplemental Table 7****One-Way ANOVA****PRIMARY NEURONAL TREATMENT**

| Treatment | n | Mean  | SEM   | df factor      | df | F      | p     | Sig. | Post hoc Tukey | Post hoc Sig. |
|-----------|---|-------|-------|----------------|----|--------|-------|------|----------------|---------------|
| Control   | 6 | 0.250 | 0.099 | between groups | 1  | 11.097 | 0.008 | **   | 0.008          | **            |
| Metformin | 6 | 1.236 | 0.279 | within groups  | 10 |        |       |      |                |               |
